# Supplementary material for: Highly Pathogenic Avian Influenza A(H5N1) Outbreaks in West Java Indonesia 2015–2016: Clinical Manifestation and Associated Risk Factors
Source: Microorganisms. 2019 Sep 6;7(9):327. doi: 10.3390/microorganisms7090327 (PMC6788193; doi:10.3390/microorganisms7090327)
Supplement: Supplementary file 1 [file microorganisms-07-00327-s001.xlsx]

## Sheet: SuppTab S1
Supplementary Materials for Highly Pathogenic Avian Influenza A(H5N1) outbreaks in West Java Indonesia 2015-2016: clinical manifestation and associated risk factors
Supplementary Materials: The following are available online at www.mdpi.com/xxx/s1
Supplementary Table S1. Data of Outbreak and Control farms
No	Status	Note	District	Poultry Type	System	Purpose	Sector	Population	Inbound contacts	Morbidity (number of sick birds)	Mortality (number of dead birds)	Subgroup of H5N1 clade 2.3.2.1c viruses (based on complete genome)	Respiratory Signs	Neurological Signs	Gastro Intestinal Signs	Dermal Apoptosis and Lesions	Sudden Death and Mortality	Fever, Lethargy and Depression	No Records
1	Outbreak	HPAI signs and Pos (+) PCR	Indramayu	Backyard chickens	Open house	Household	Sector 4	40	1	3	30	NA	Yes	No	No	Yes	Yes	No	No
2	Outbreak	HPAI signs and Pos (+) PCR	Subang	Backyard chickens	Open house	Household	Sector 4	7	18	7	4	R	No	No	No	No	Yes	No	No
3	Outbreak	HPAI signs and Pos (+) PCR	Subang	Backyard chickens	Open house	Household	Sector 4	30	0	33	8	B	No	No	No	Yes	No	No	No
4	Outbreak	HPAI signs and Pos (+) PCR	Subang	Backyard chickens	Open house	Household	Sector 4	40	56	26	25	R	No	No	Yes	Yes	Yes	No	No
5	Outbreak	HPAI signs and Pos (+) PCR	Subang	Backyard chickens	Open house	Household	Sector 4	25	84	25	25	B	No	No	No	Yes	Yes	No	No
6	Outbreak	HPAI signs and Pos (+) PCR	Subang	Backyard chickens	Open house	Household	Sector 4	28	29	28	28	B	No	No	Yes	No	Yes	Yes	No
7	Outbreak	HPAI signs and Pos (+) PCR	Subang	Backyard chickens	Open house	Household	Sector 4	37	73	29	29	B	Yes	No	No	No	No	Yes	No
8	Outbreak	HPAI signs and Pos (+) PCR	Subang	Backyard chickens	Open house	Household	Sector 4	45	15	14	14	NA	Yes	No	No	No	No	Yes	No
9	Outbreak	HPAI signs and Pos (+) PCR	Subang	Backyard chickens	Open house	Household	Sector 4	30	2	10	5	B	Yes	No	No	Yes	No	Yes	No
10	Outbreak	HPAI signs and Pos (+) PCR	Subang	Backyard chickens	Open house	Household	Sector 4	13	14	8	10	B	Yes	No	Yes	No	No	Yes	No
11	Outbreak	HPAI signs and Pos (+) PCR	Subang	Backyard chickens	Open house	Household	Sector 4	32	16	27	27	NA	Yes	No	No	Yes	No	Yes	No
12	Outbreak	HPAI signs and Pos (+) PCR	Subang	Backyard chickens	Open house	Household	Sector 4	32	16	9	29	B	Yes	No	No	Yes	No	Yes	No
13	Outbreak	HPAI signs and Pos (+) PCR	Subang	Backyard chickens	Open house	Household	Sector 4	18	16	6	10	B	Yes	No	No	Yes	Yes	No	No
14	Outbreak	HPAI signs and Pos (+) PCR	Indramayu	Ducks (Muscovy Duck)	Open house	Commercial	Sector 4	68	15	18	14	B	No	Yes	No	Yes	No	Yes	No
15	Outbreak	HPAI signs and Pos (+) PCR	Indramayu	Backyard chickens	Open house	Household	Sector 4	50	0	13	40	B	Yes	No	No	Yes	No	No	No
16	Outbreak	HPAI signs and Pos (+) PCR	Indramayu	Backyard chickens	Open house	Household	Sector 4	30	15	10	20	R	No	No	No	Yes	No	No	No
17	Outbreak	HPAI signs and Pos (+) PCR	Indramayu	Backyard chickens	Open house	Household	Sector 4	19	15	0	2	R	No	No	No	Yes	Yes	No	No
18	Outbreak	HPAI signs and Pos (+) PCR	Indramayu	Backyard chickens	Open house	Household	Sector 4	30	15	10	3	NA	Yes	No	Yes	No	No	No	No
19	Outbreak	HPAI signs and Pos (+) PCR	Subang	Ducks (Muscovy Duck)	Open house	Household	Sector 4	21	1	17	17	NA	Yes	No	No	Yes	No	Yes	No
20	Outbreak	HPAI signs and Pos (+) PCR	Subang	Ducks (Muscovy Duck)	Open house	Household	Sector 4	15	1	7	10	NA	Yes	No	No	Yes	No	No	No
21	Outbreak	HPAI signs and Pos (+) PCR	Indramayu	Backyard chickens	Open house	Household	Sector 4	40	6	9	28	B	No	Yes	No	Yes	Yes	Yes	No
22	Outbreak	HPAI signs and Pos (+) PCR	Indramayu	Backyard chickens	Open house	Household	Sector 4	19	70	4	11	NA	No	No	No	Yes	No	Yes	No
23	Outbreak	HPAI signs and Pos (+) PCR	Indramayu	Backyard chickens	Open house	Household	Sector 4	32	15	7	25	B	No	No	No	Yes	No	Yes	No
24	Outbreak	HPAI signs and Pos (+) PCR	Indramayu	Ducks	Open house	Household	Sector 4	20	4	7	12	NA	Yes	No	Yes	Yes	No	No	No
25	Outbreak	HPAI signs and Pos (+) PCR	Indramayu	Ducks	Open house	Commercial	Sector 4	74	7	24	49	B	Yes	Yes	Yes	No	Yes	Yes	No
26	Outbreak	HPAI signs and Pos (+) PCR	Indramayu	Backyard chickens	Open house	Household	Sector 4	33	0	27	29	NA	No	No	No	Yes	Yes	No	No
27	Outbreak	HPAI signs and Pos (+) PCR	Subang	Backyard chickens	Open house	Household	Sector 4	20	15	12	18	NA	Yes	No	No	No	No	No	No
28	Outbreak	HPAI signs and Pos (+) PCR	Subang	Backyard chickens	Open house	Household	Sector 4	27	15	15	22	NA	Yes	No	No	No	No	No	No
29	Outbreak	HPAI signs and Pos (+) PCR	Subang	Backyard chickens	Open house	Household	Sector 4	18	16	13	14	NA	Yes	No	No	Yes	No	No	No
30	Outbreak	HPAI signs and Pos (+) PCR	Subang	Backyard chickens	Open house	Household	Sector 4	27	16	5	8	NA	No	No	No	No	No	No	No
31	Outbreak	HPAI signs and Pos (+) PCR	Indramayu	Others (Turkey)	Open house	Household	Sector 4	27	0	1	4	B	No	No	No	Yes	No	Yes	No
32	Outbreak	HPAI signs and Pos (+) PCR	Subang	Backyard chickens	Open house	Household	Sector 4	12	16	10	9	NA	Yes	No	Yes	No	Yes	No	No
33	Outbreak	HPAI signs and Pos (+) PCR	Indramayu	Backyard chickens	Open house	Household	Sector 4	25	43	2	2	B	No	No	No	Yes	Yes	No	No
34	Outbreak	HPAI signs and Pos (+) PCR	Indramayu	Backyard chickens	Open house	Household	Sector 4	54	1	25	26	NA	Yes	No	No	Yes	No	No	No
35	Outbreak	HPAI signs and Pos (+) PCR	Indramayu	Ducks (Muscovy Duck)	Open house	Commercial	Sector 4	70	28	11	4	NA	No	Yes	No	Yes	No	No	No
36	Outbreak	HPAI signs and Pos (+) PCR	Indramayu	Backyard chickens	Open house	Household	Sector 4	34	14	3	4	B	No	No	No	Yes	Yes	No	No
37	Outbreak	HPAI signs and Pos (+) PCR	Indramayu	Backyard chickens	Open house	Household	Sector 4	30	14	0	20	NA	No	No	No	Yes	Yes	No	No
38	Outbreak	HPAI signs and Pos (+) PCR	Indramayu	Others (Layer)	Open house	Household	Sector 4	35	1	1	2	NA	No	No	No	Yes	Yes	No	No
39	Outbreak	HPAI signs and Pos (+) PCR	Indramayu	Ducks (Muscovy Duck)	Open house	Household	Sector 4	42	0	7	10	NA	Yes	No	Yes	Yes	Yes	Yes	No
40	Outbreak	HPAI signs and Pos (+) PCR	Rest (Sukabumi)	Backyard chickens	Open house	Household	Sector 4	NA	NA	NA	NA	B	NA	NA	NA	NA	NA	NA	Yes
41	Outbreak	HPAI signs and Pos (+) PCR	Rest (Sukabumi)	Backyard chickens	Open house	Household	Sector 4	NA	NA	NA	NA	B	NA	NA	NA	NA	NA	NA	Yes
42	Outbreak	HPAI signs and Pos (+) PCR	Subang	Ducks (Muscovy Duck)	Open house	Commercial	Sector 4	100	28	80	80	A	No	Yes	No	Yes	Yes	No	No
43	Outbreak	HPAI signs and Pos (+) PCR	Indramayu	Ducks	Open house	Commercial	Sector 3	920	0	230	230	NA	No	Yes	No	Yes	No	No	No
44	Outbreak	HPAI signs and Pos (+) PCR	Subang	Ducks	Open house	Commercial	Sector 3	500	1	85	130	A	No	Yes	No	Yes	No	No	No
45	Outbreak	HPAI signs and Pos (+) PCR	Subang	Others (Commercial Native Chicken)	Open house	Commercial	Sector 3	150	16	43	8	A	No	No	Yes	No	No	Yes	No
46	Outbreak	HPAI signs and Pos (+) PCR	Indramayu	Backyard chickens	Open house	Commercial	Sector 4	105	1	0	50	R	No	No	No	No	Yes	Yes	No
47	Outbreak	HPAI signs and Pos (+) PCR	Indramayu	Ducks	Open house	Commercial	Sector 3	970	3	100	80	B	Yes	Yes	Yes	Yes	No	No	No
48	Outbreak	HPAI signs and Pos (+) PCR	Indramayu	Ducks	Open house	Commercial	Sector 3	300	14	4	8	R	No	No	Yes	Yes	No	No	No
49	Outbreak	HPAI signs and Pos (+) PCR	Indramayu	Others (Layer)	Open house	Commercial	Sector 3	125	44	3	60	B	No	No	No	Yes	Yes	No	No
50	Outbreak	HPAI signs and Pos (+) PCR	Subang	Ducks	Open house	Commercial	Sector 3	500	1	90	90	NA	Yes	No	No	No	No	No	No
51	Outbreak	HPAI signs and Pos (+) PCR	Indramayu	Backyard chickens	Open house	Commercial	Sector 4	102	28	5	9	NA	No	No	No	Yes	Yes	No	No
52	Outbreak	HPAI signs and Pos (+) PCR	Indramayu	Others (Quail)	Open house	Commercial	Sector 3	900	0	500	454	R	No	No	Yes	No	No	Yes	No
53	Outbreak	HPAI signs and Pos (+) PCR	Subang	Ducks	Open house	Commercial	Sector 3	300	4	35	10	A	No	Yes	No	Yes	No	No	No
54	Outbreak	HPAI signs and Pos (+) PCR	Rest (Tasikmalaya)	Others (Layer)	Open house	Commercial	Sector 3	800	0	21	40	A	Yes	No	No	No	Yes	No	No
55	Outbreak	HPAI signs and Pos (+) PCR	Indramayu	Others (Commercial Native Chicken)	Open house	Commercial	Sector 3	650	9	30	45	NA	No	No	No	No	Yes	Yes	No
56	Outbreak	HPAI signs and Pos (+) PCR	Subang	Ducks	Open house	Commercial	Sector 3	2000	30	1005	1005	NA	No	Yes	No	No	No	Yes	No
57	Outbreak	HPAI signs and Pos (+) PCR	Rest (Tasikmalaya)	Ducks	Open house	Commercial	Sector 3	10000	0	30	25	NA	Yes	Yes	Yes	Yes	Yes	Yes	No
58	Outbreak	HPAI signs and Pos (+) PCR	Indramayu	Others (Quail)	Open house	Commercial	Sector 3	3000	30	52	127	B	No	Yes	No	No	No	Yes	No
59	Outbreak	HPAI signs and Pos (+) PCR	Indramayu	Ducks	Open house	Commercial	Sector 3	1500	1	200	20	B	No	Yes	No	Yes	No	No	No
60	Outbreak	HPAI signs and Pos (+) PCR	Subang	Others (Broiler)	Open house	Commercial	Sector 3	8000	2	5000	5000	NA	No	No	Yes	No	Yes	No	No
61	Outbreak	HPAI signs and Pos (+) PCR	Subang	Others (Quail)	Open house	Commercial	Sector 3	1200	56	1000	900	B	No	No	No	No	No	No	Yes
62	Outbreak	HPAI signs and Pos (+) PCR	Rest (Sukabumi)	Others (Breeder Broiler)	Closed house	Commercial	Sector 1	80000	0	0	24	NA	No	No	No	No	No	Yes	No
63	Outbreak	HPAI signs and Pos (+) PCR	Rest (Sukabumi)	Others (Breeder Broiler)	Closed house	Commercial	Sector 1	80000	0	0	24	NA	No	No	No	No	No	Yes	No
64	Outbreak	HPAI signs and Pos (+) PCR	Rest (Bogor)	Others (Broiler)	Closed house	Commercial	Sector 1	415000	0	68	6.8	NA	Yes	No	No	No	No	No	No
65	Outbreak	HPAI signs and Pos (+) PCR	Rest (Bandung)	Ducks (Muscovy Duck)	Open house	Commercial	Sector 4	102	0	30	20	NA	No	Yes	No	Yes	No	No	No
66	Outbreak	HPAI signs and Pos (+) PCR	Rest (Purwakarta)	Backyard chickens	Open house	Commercial	Sector 4	184	30	28	137	R	Yes	Yes	No	No	No	No	No
67	Outbreak	HPAI signs and Pos (+) PCR	Rest (Purwakarta)	Others (Quail)	Open house	Commercial	Sector 3	412	28	100	100	R	No	Yes	Yes	No	No	No	No
68	Outbreak	HPAI signs and Pos (+) PCR	Rest (Purwakarta)	Ducks	Open house	Household	Sector 4	40	0	5	20	NA	No	Yes	Yes	Yes	No	No	No
69	Outbreak	HPAI signs and Pos (+) PCR	Rest (Purwakarta)	Others (Quail)	Open house	Commercial	Sector 3	1000	0	500	500	B	No	No	Yes	Yes	No	No	No
70	Control	None Outbreaks (previously) reported	Indramayu	Backyard chickens	Open house	Household	Sector 4	30	14	NA	NA	NA	NA	NA	NA	NA	NA	NA	NA
71	Control	None Outbreaks (previously) reported	Indramayu	Backyard chickens	Open house	Household	Sector 4	25	1.93	NA	NA	NA	NA	NA	NA	NA	NA	NA	NA
72	Control	None Outbreaks (previously) reported	Indramayu	Backyard chickens	Open house	Household	Sector 4	15	4.34	NA	NA	NA	NA	NA	NA	NA	NA	NA	NA
73	Control	None Outbreaks (previously) reported	Indramayu	Backyard chickens	Open house	Household	Sector 4	25	4.52	NA	NA	NA	NA	NA	NA	NA	NA	NA	NA
74	Control	None Outbreaks (previously) reported	Indramayu	Ducks	Open house	Commercial	Sector 3	400	3.23	NA	NA	NA	NA	NA	NA	NA	NA	NA	NA
75	Control	None Outbreaks (previously) reported	Rest (Sukabumi)	Others (Commercial Native Chicken)	Open house	Commercial	Sector 3	6000	0	NA	NA	NA	NA	NA	NA	NA	NA	NA	NA
76	Control	None Outbreaks (previously) reported	Rest (Sukabumi)	Others (Commercial Native Chicken)	Open house	Commercial	Sector 3	4000	2.26	NA	NA	NA	NA	NA	NA	NA	NA	NA	NA
77	Control	None Outbreaks (previously) reported	Rest (Sukabumi)	Others (Commercial Native Chicken)	Open house	Commercial	Sector 3	2000	2.26	NA	NA	NA	NA	NA	NA	NA	NA	NA	NA
78	Control	None Outbreaks (previously) reported	Subang	Others (Broiler)	Open house	Commercial	Sector 3	5000	1.62	NA	NA	NA	NA	NA	NA	NA	NA	NA	NA
79	Control	None Outbreaks (previously) reported	Subang	Others (Broiler)	Open house	Commercial	Sector 3	3000	0.5	NA	NA	NA	NA	NA	NA	NA	NA	NA	NA
80	Control	None Outbreaks (previously) reported	Subang	Others (Broiler)	Open house	Commercial	Sector 3	3000	1.56	NA	NA	NA	NA	NA	NA	NA	NA	NA	NA
81	Control	None Outbreaks (previously) reported	Subang	Others (Broiler)	Open house	Commercial	Sector 3	3000	1.04	NA	NA	NA	NA	NA	NA	NA	NA	NA	NA
82	Control	None Outbreaks (previously) reported	Subang	Others (Broiler)	Open house	Commercial	Sector 3	7500	1.93	NA	NA	NA	NA	NA	NA	NA	NA	NA	NA
83	Control	None Outbreaks (previously) reported	Subang	Others (Broiler)	Open house	Commercial	Sector 3	6000	2.33	NA	NA	NA	NA	NA	NA	NA	NA	NA	NA
84	Control	None Outbreaks (previously) reported	Subang	Others (Broiler)	Open house	Commercial	Sector 3	5500	1.75	NA	NA	NA	NA	NA	NA	NA	NA	NA	NA
85	Control	None Outbreaks (previously) reported	Rest (Sukabumi)	Others (Broiler)	Open house	Commercial	Sector 3	5000	2.63	NA	NA	NA	NA	NA	NA	NA	NA	NA	NA
86	Control	None Outbreaks (previously) reported	Rest (Sukabumi)	Others (Broiler)	Open house	Commercial	Sector 3	7000	0	NA	NA	NA	NA	NA	NA	NA	NA	NA	NA
87	Control	None Outbreaks (previously) reported	Rest (Ciamis)	Others (Broiler)	Open house	Commercial	Sector 3	2000	2.71	NA	NA	NA	NA	NA	NA	NA	NA	NA	NA
88	Control	None Outbreaks (previously) reported	Rest (Ciamis)	Others (Broiler)	Open house	Commercial	Sector 3	3000	0.93	NA	NA	NA	NA	NA	NA	NA	NA	NA	NA
89	Control	None Outbreaks (previously) reported	Rest (Ciamis)	Others (Broiler)	Open house	Commercial	Sector 3	2700	0.44	NA	NA	NA	NA	NA	NA	NA	NA	NA	NA
90	Control	None Outbreaks (previously) reported	Rest (Ciamis)	Others (Broiler)	Open house	Commercial	Sector 3	2800	0.47	NA	NA	NA	NA	NA	NA	NA	NA	NA	NA
91	Control	None Outbreaks (previously) reported	Rest (Ciamis)	Others (Broiler)	Open house	Commercial	Sector 3	4000	3.29	NA	NA	NA	NA	NA	NA	NA	NA	NA	NA
92	Control	None Outbreaks (previously) reported	Rest (Ciamis)	Others (Broiler)	Open house	Commercial	Sector 3	5500	2.8	NA	NA	NA	NA	NA	NA	NA	NA	NA	NA
93	Control	None Outbreaks (previously) reported	Rest (Ciamis)	Others (Broiler)	Open house	Commercial	Sector 3	1800	2.71	NA	NA	NA	NA	NA	NA	NA	NA	NA	NA
94	Control	None Outbreaks (previously) reported	Rest (Ciamis)	Others (Broiler)	Open house	Commercial	Sector 3	6000	3.5	NA	NA	NA	NA	NA	NA	NA	NA	NA	NA
95	Control	None Outbreaks (previously) reported	Rest (Ciamis)	Others (Broiler)	Open house	Commercial	Sector 3	6500	1.87	NA	NA	NA	NA	NA	NA	NA	NA	NA	NA
96	Control	None Outbreaks (previously) reported	Rest (Ciamis)	Others (Broiler)	Open house	Commercial	Sector 3	2000	4.24	NA	NA	NA	NA	NA	NA	NA	NA	NA	NA
97	Control	None Outbreaks (previously) reported	Rest (Tasikmalaya)	Others (Layer)	Open house	Commercial	Sector 3	7500	2.8	NA	NA	NA	NA	NA	NA	NA	NA	NA	NA
98	Control	None Outbreaks (previously) reported	Rest (Sukabumi)	Others (Commercial Native Chicken)	Open house	Commercial	Sector 3	30000	1.81	NA	NA	NA	NA	NA	NA	NA	NA	NA	NA
99	Control	None Outbreaks (previously) reported	Rest (Sukabumi)	Others (Commercial Native Chicken)	Open house	Commercial	Sector 3	30000	3.16	NA	NA	NA	NA	NA	NA	NA	NA	NA	NA
100	Control	None Outbreaks (previously) reported	Subang	Others (Broiler)	Open house	Commercial	Sector 3	24000	1.68	NA	NA	NA	NA	NA	NA	NA	NA	NA	NA
101	Control	None Outbreaks (previously) reported	Subang	Others (Broiler)	Open house	Commercial	Sector 3	40000	0.64	NA	NA	NA	NA	NA	NA	NA	NA	NA	NA
102	Control	None Outbreaks (previously) reported	Subang	Others (Broiler)	Open house	Commercial	Sector 3	25000	3.77	NA	NA	NA	NA	NA	NA	NA	NA	NA	NA
103	Control	None Outbreaks (previously) reported	Rest (Sukabumi)	Others (Broiler)	Open house	Commercial	Sector 3	17000	0	NA	NA	NA	NA	NA	NA	NA	NA	NA	NA
104	Control	None Outbreaks (previously) reported	Rest (Sukabumi)	Others (Broiler)	Open house	Commercial	Sector 3	30000	6.32	NA	NA	NA	NA	NA	NA	NA	NA	NA	NA
105	Control	None Outbreaks (previously) reported	Rest (Sukabumi)	Others (Broiler)	Open house	Commercial	Sector 3	15000	2.26	NA	NA	NA	NA	NA	NA	NA	NA	NA	NA
106	Control	None Outbreaks (previously) reported	Rest (Sukabumi)	Others (Broiler)	Open house	Commercial	Sector 3	30000	0	NA	NA	NA	NA	NA	NA	NA	NA	NA	NA
107	Control	None Outbreaks (previously) reported	Rest (Sukabumi)	Others (Broiler)	Open house	Commercial	Sector 3	30000	1.75	NA	NA	NA	NA	NA	NA	NA	NA	NA	NA
108	Control	None Outbreaks (previously) reported	Rest (Sukabumi)	Others (Broiler)	Open house	Commercial	Sector 3	22115	0.44	NA	NA	NA	NA	NA	NA	NA	NA	NA	NA
109	Control	None Outbreaks (previously) reported	Rest (Sukabumi)	Others (Broiler)	Open house	Commercial	Sector 3	13000	0.45	NA	NA	NA	NA	NA	NA	NA	NA	NA	NA
110	Control	None Outbreaks (previously) reported	Rest (Sukabumi)	Others (Broiler)	Open house	Commercial	Sector 3	20000	0.45	NA	NA	NA	NA	NA	NA	NA	NA	NA	NA
111	Control	None Outbreaks (previously) reported	Indramayu	Others (Layer)	Open house	Commercial	Sector 3	10200	2.26	NA	NA	NA	NA	NA	NA	NA	NA	NA	NA
112	Control	None Outbreaks (previously) reported	Rest (Sukabumi)	Others (Layer)	Open house	Commercial	Sector 3	12000	0	NA	NA	NA	NA	NA	NA	NA	NA	NA	NA
113	Control	None Outbreaks (previously) reported	Rest (Sukabumi)	Others (Layer)	Open house	Commercial	Sector 3	60000	9.48	NA	NA	NA	NA	NA	NA	NA	NA	NA	NA
114	Control	None Outbreaks (previously) reported	Rest (Sukabumi)	Others (Layer)	Open house	Commercial	Sector 3	20000	0	NA	NA	NA	NA	NA	NA	NA	NA	NA	NA
115	Control	None Outbreaks (previously) reported	Rest (Sukabumi)	Others (Layer)	Open house	Commercial	Sector 3	15000	0.9	NA	NA	NA	NA	NA	NA	NA	NA	NA	NA
116	Control	None Outbreaks (previously) reported	Rest (Sukabumi)	Others (Layer)	Open house	Commercial	Sector 3	40000	0	NA	NA	NA	NA	NA	NA	NA	NA	NA	NA
117	Control	None Outbreaks (previously) reported	Rest (Sukabumi)	Others (Broiler)	Closed house	Commercial	Sector 1	96000	0	NA	NA	NA	NA	NA	NA	NA	NA	NA	NA
118	Control	None Outbreaks (previously) reported	Rest (Bogor)	Others (Broiler)	Closed house	Commercial	Sector 1	66000	0	NA	NA	NA	NA	NA	NA	NA	NA	NA	NA
119	Control	None Outbreaks (previously) reported	Rest (Sukabumi)	Others (Breeder Broiler)	Closed house	Commercial	Sector 1	64000	0	NA	NA	NA	NA	NA	NA	NA	NA	NA	NA
120	Control	None Outbreaks (previously) reported	Rest (Sukabumi)	Others (Breeder Broiler)	Closed house	Commercial	Sector 1	64000	0	NA	NA	NA	NA	NA	NA	NA	NA	NA	NA
121	Control	None Outbreaks (previously) reported	Rest (Sukabumi)	Others (Breeder Broiler)	Closed house	Commercial	Sector 1	80000	0	NA	NA	NA	NA	NA	NA	NA	NA	NA	NA
122	Control	None Outbreaks (previously) reported	Rest (Sukabumi)	Others (Breeder Broiler)	Closed house	Commercial	Sector 1	35000	0	NA	NA	NA	NA	NA	NA	NA	NA	NA	NA
123	Control	None Outbreaks (previously) reported	Rest (Bogor)	Others (Breeder Broiler)	Closed house	Commercial	Sector 1	65000	0	NA	NA	NA	NA	NA	NA	NA	NA	NA	NA
124	Control	None Outbreaks (previously) reported	Rest (Cianjur)	Others (Broiler)	Closed house	Commercial	Sector 1	208000	0	NA	NA	NA	NA	NA	NA	NA	NA	NA	NA
125	Control	None Outbreaks (previously) reported	Rest (Bogor)	Others (Broiler)	Closed house	Commercial	Sector 1	130000	0	NA	NA	NA	NA	NA	NA	NA	NA	NA	NA
126	Control	None Outbreaks (previously) reported	Rest (Bogor)	Others (Broiler)	Closed house	Commercial	Sector 1	146000	0	NA	NA	NA	NA	NA	NA	NA	NA	NA	NA
127	Control	None Outbreaks (previously) reported	Rest (Sukabumi)	Others (Broiler)	Closed house	Commercial	Sector 1	223000	0	NA	NA	NA	NA	NA	NA	NA	NA	NA	NA
128	Control	None Outbreaks (previously) reported	Rest (Sukabumi)	Others (Breeder Boiler)	Closed house	Commercial	Sector 1	120000	0	NA	NA	NA	NA	NA	NA	NA	NA	NA	NA
129	Control	None Outbreaks (previously) reported	Rest (Bogor)	Others (Breeder Layer)	Closed house	Commercial	Sector 1	140000	0	NA	NA	NA	NA	NA	NA	NA	NA	NA	NA
							NA = Not available, R = Reassortment

## Sheet: SuppFig S1
Supplementary Figure S1 Logbook for epidemiological data of normal farms.

## Sheet: SuppFig S2
Supplementary Figure S2. A few parts of outbreak questionnaire
